# Supplementary material for: Screening of five marine-derived fungal strains for their potential to produce oxidases with laccase activities suitable for biotechnological applications
Source: PubMed Central journal article supplement (PMC7218534; doi:10.1186/s12896-020-00617-y), 2020-05-12
Supplement: 12896_2020_617_MOESM1_ESM.pdf [file 12896_2020_617_MOESM1_ESM.pdf]

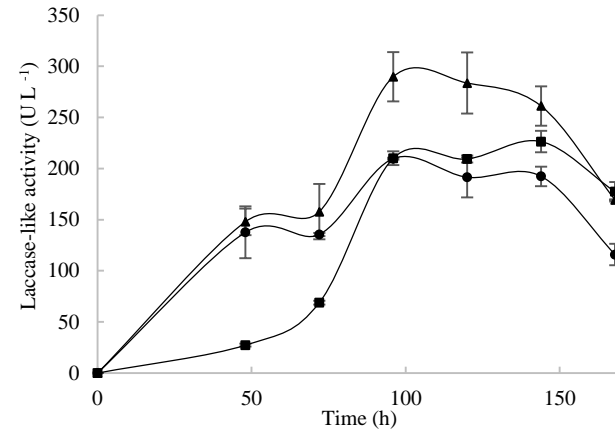

**Fig. 1S**
